# Supplementary material
Source: PubMed Central journal article supplement (PMC8934136)
Supplement: NIHMS1784930-supplement-tS1.pdf [file NIHMS1784930-supplement-tS1.pdf]

**Supplemental Table 1. Baseline characteristics for included and excluded patients**

|                                | <b>Included</b>                       | <b>Excluded</b> | <b>P Value</b> |
|--------------------------------|---------------------------------------|-----------------|----------------|
|                                | N = 7716                              | N = 820         |                |
|                                | N (%) or median (interquartile range) |                 |                |
| Gender                         |                                       |                 |                |
| Female                         | 3879 (50)                             | 431 (53)        | 0.21           |
| Ethnicity                      |                                       |                 |                |
| Hispanic                       | 1857 (24)                             | 184 (22)        | 0.3            |
| Race                           |                                       |                 |                |
| White                          | 5746 (75)                             | 651 (79)        | 0.003          |
| Black                          | 1286 (17)                             | 100 (12)        |                |
| Other                          | 684 (9)                               | 69 (8)          |                |
| Insurance                      |                                       |                 |                |
| Private                        | 3498 (45)                             | 315 (38)        | <0.001         |
| Public                         | 4033 (52)                             | 370 (45)        |                |
| Other                          | 182 (2)                               | 135 (17)        |                |
| Diagnosis                      |                                       |                 |                |
| Biliary atresia                | 2122 (28)                             | 233 (28)        | <0.001         |
| Cholestatic liver disease      | 1709 (22)                             | 166 (20)        |                |
| Acute liver failure            | 959 (12)                              | 80 (10)         |                |
| Metabolic                      | 660 (9)                               | 110 (13)        |                |
| Tumor                          | 578 (8)                               | 56 (7)          |                |
| Autoimmune hepatitis           | 365 (5)                               | 32 (4)          |                |
| Other                          | 1323 (17)                             | 143 (17)        |                |
| Living donor transplant        | 602 (7.8)                             | 57 (7.0)        | 0.39           |
| Time on waitlist (days)        | 59 (13-186)                           | 60 (16.5-187.5) | 0.90           |
| Status 1A/1B at listing        | 1582 (21)                             | 147 (18)        | 0.08           |
| Status 1A/1B at transplant     | 2143 (28)                             | 198 (24)        | 0.03           |
| Status 1A/1B at any time point | 2462 (32)                             | 226 (28)        | 0.01           |
| Initial lab PELD/MELD          | 14 (4-23)                             | 14 (5-23)       | 0.72           |
| Final lab PELD/MELD            | 15 (4-25)                             | 14 (4-25)       | 0.62           |

|                              |            |            |       |
|------------------------------|------------|------------|-------|
| Initial allocation PELD/MELD | 16 (7-27)  | 14 (6-24)  | 0.01  |
| Final allocation PELD/MELD   | 25 (16-34) | 26 (17-34) | 0.51  |
| Initial lab PELD/MELD > 30   | 995 (13)   | 104 (13)   | 0.86  |
| Ascites present              | 1124 (18)  | 129 (20)   | 0.32  |
| Encephalopathy present       | 595 (10)   | 63 (10)    | 0.97  |
| Waitlist outcome             |            |            |       |
| Censored                     | 148 (2)    | 11 (1)     | 0.001 |
| Death or Sick                | 776 (10)   | 57 (7)     |       |
| DDLT                         | 5128 (67)  | 602 (73)   |       |
| Other removal                | 1062 (14)  | 93 (11)    |       |
| LDLT                         | 602 (8)    | 57 (7)     |       |

Abbreviations: DDLT, deceased donor liver transplant; LDLT, living donor liver transplant; MELD, Model for End-Stage Liver Disease; PELD, Pediatric End-Stage Liver Disease;
